# Supplementary material for: Silver- and Zinc-Decorated Polyurethane Ionomers with Tunable Hard/Soft Phase Segregation
Source: MDPI journal article supplement (doi:10.3390/ijms22116134), 2021-06-07
Supplement: s1 [file s1]

## Silver and zinc **decorated**-polyurethane ionomers with tunable *hard/soft* phase segregation

Irene Rapone<sup>1</sup>, Vincenzo Taresco<sup>2</sup>, **Valerio Di Lisio**<sup>1</sup>, Antonella Piozzi<sup>1</sup>, Iolanda Francolini<sup>1\*</sup>

<sup>1</sup> Department of Chemistry, Sapienza University of Rome, Rome, Italy

<sup>2</sup> School of Chemistry, University of Nottingham, Nottingham, UK

**\* Correspondence to: Prof. Iolanda Francolini**

Department of Chemistry, Sapienza University of Rome

Piazzale Aldo Moro, 5 – 00185, Rome, Italy

E-mail: [iolanda.francolini@uniroma1.it](mailto:iolanda.francolini@uniroma1.it)

Phone: +39 06 49913162

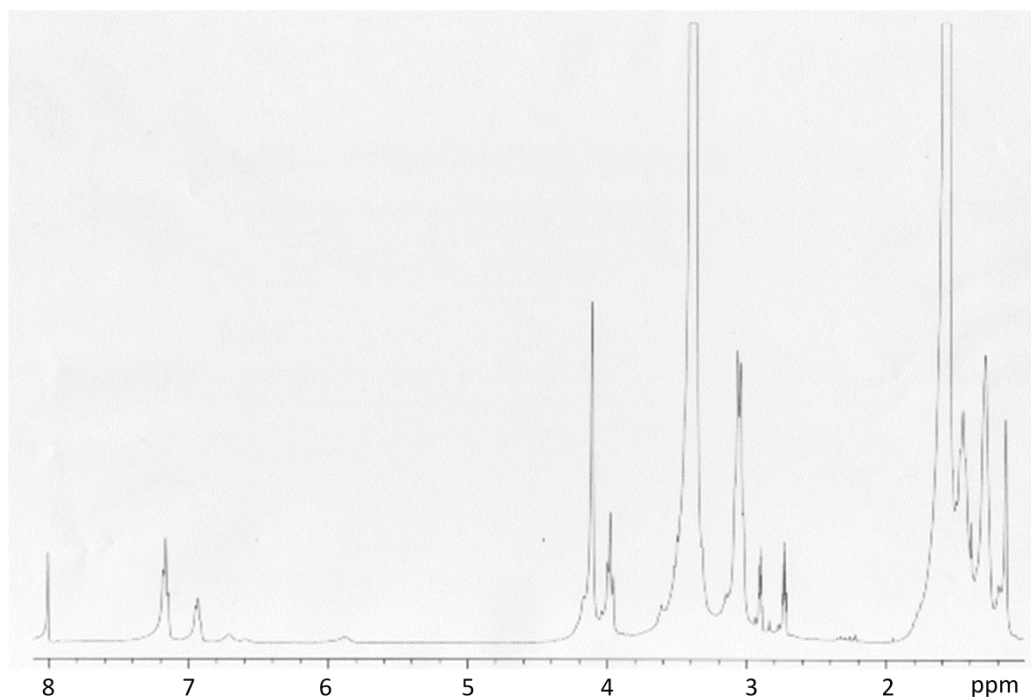

**Figure S1:**  $^1\text{H}$ -NMR spectrum of PU2-HMDI in  $\text{N,N-DMF-d}_7$ .

The  $^1\text{H}$ -NMR spectrum of PU2-HMDI shows the characteristic peaks that in accordance with the proposed structure confirmed the success of the reaction. In particular, Signals at 6.9 and 7.2 ppm were related to urethane NH, specifically to the *syn* and *anti* rotamers around the C-N linkage of the urethane group [29, 30]. Signals at 1.6 and 3.5 ppm were related to the hydrogens of the internal  $\text{CH}_2$  of HMDI and PTMO while the signal at 3.1 ppm was attributed to  $\text{CH}_2$  of HMDI when linked to the urethane NH. Finally, signals at 4.1 and 1.1 ppm were related to the  $\text{CH}_2$  and  $\text{CH}_3$  of DHMPA, respectively. The 3:2:1 monomer molar ratio of the polymer repeat unit was confirmed by the integrals' ratio of signals at 6.9 (urethane NH) and 1.1 (DHMPA  $\text{CH}_3$ ) ppm.
